# Supplementary material for: Nutritional quality of food as represented by the FSAm-NPS nutrient profiling system underlying the Nutri-Score label and cancer risk in Europe: Results from the EPIC prospective cohort study
Source: PubMed Central journal article supplement (PMC6143197; doi:10.1371/journal.pmed.1002651), 2018-09-18

**S1 Fig. The Nutri-Score front-of-pack nutritional label (Santé Publique France)**

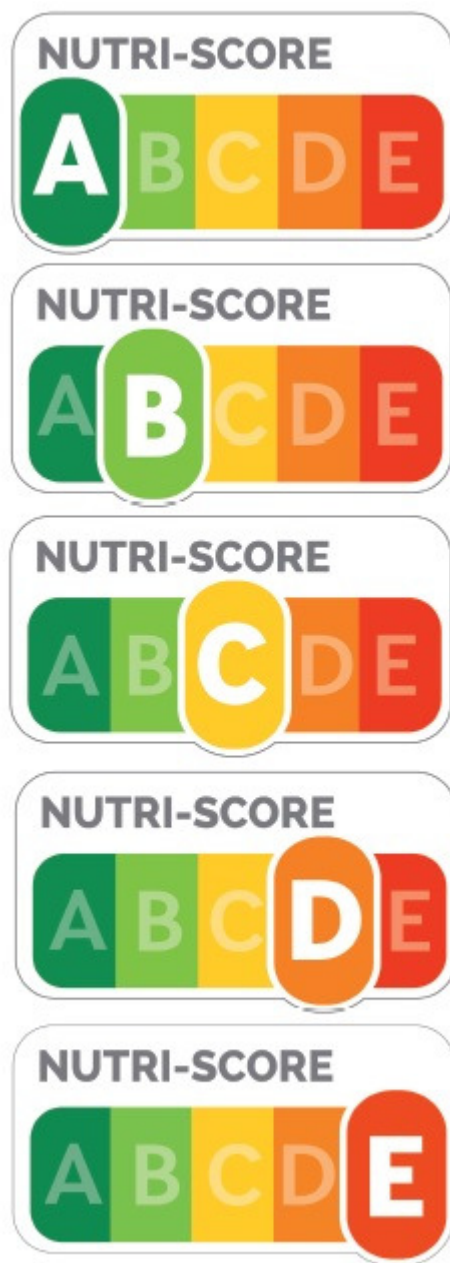

Supplement: pmed.1002651.s001.pdf [file pmed.1002651.s001.pdf]
